# Supplementary material
Source: MDPI journal article supplement (https://www.mdpi.com/1424-2818/14/1/42)
Supplement: s1 [file s1]

**Table S1.** Global density (cells mL<sup>-1</sup>) and biovolume (mm<sup>3</sup> m<sup>-3</sup>) of the phytoplankton taxa recorded in Lakes El Sol and La Luna, Nevado de Toluca. (*Navicula* NTA and *N. NTB* according to [12]).

| Taxa                                     | Lake El Sol                       |                                            | Lake La Luna                      |                                            |
|------------------------------------------|-----------------------------------|--------------------------------------------|-----------------------------------|--------------------------------------------|
|                                          | Density<br>cells mL <sup>-1</sup> | Biomass<br>mm <sup>3</sup> m <sup>-3</sup> | Density<br>cells mL <sup>-1</sup> | Biomass<br>mm <sup>3</sup> m <sup>-3</sup> |
| <i>Limnococcus limneticus</i>            | 198                               | 1 328                                      | < 100                             | < 1 000                                    |
| <i>Anabaena</i> cf. <i>lapponica</i>     | < 100                             | < 100                                      | < 100                             | < 100                                      |
| <i>Anabaena</i> sp.                      | < 100                             | < 1 000                                    | NF                                | NF                                         |
| <i>Limnoraphis birgei</i>                | < 100                             | < 1 000                                    | NF                                | NF                                         |
| <i>Oscillatoria</i> sp.                  | < 100                             | 1 117                                      | < 100                             | < 1 000                                    |
| <i>Merismopedia</i> sp.                  | < 100                             | < 1 000                                    | NF                                | NF                                         |
| <i>Synechocystis</i> sp.                 | 390                               | 6 434                                      | 107411                            | 348 202                                    |
| <i>Synechocystis minuscula</i>           | < 100                             | < 1 000                                    | NF                                | NF                                         |
| <i>Pseudoanabaena</i> sp.                | < 100                             | < 1 000                                    | NF                                | NF                                         |
| <i>Chromulina</i> sp.                    | 1737                              | 5 389                                      | < 100                             | < 1 000                                    |
| <i>Chrysococcus minutus</i>              | 254                               | 3 196                                      | NF                                | NF                                         |
| <i>Dinobryon</i> cf. <i>sociale</i>      | 116                               | 2 677                                      | NF                                | NF                                         |
| <i>Ochromonas</i> sp.                    | 1389                              | 5 005                                      | < 100                             | < 1 000                                    |
| <i>Mallomonas</i> cf. <i>Acaroides</i>   | < 100                             | < 1 000                                    | NF                                | NF                                         |
| <i>Mallomonas</i> sp. 1                  | < 100                             | 7 692                                      | < 100                             | 3 032                                      |
| <i>Mallomonas</i> sp. 2                  | < 100                             | < 1 000                                    | NF                                | NF                                         |
| <i>Aulacoseira nivaloides</i>            | < 100                             | 2 512                                      | < 100                             | < 1 000                                    |
| <i>Aulacoseira</i> cf. <i>alpigena</i>   | < 100                             | < 1 000                                    | < 100                             | < 1 000                                    |
| <i>Cyclotella</i> aff. <i>quillensis</i> | < 100                             | 11 282                                     | < 100                             | 2 063                                      |
| <i>Cyclotella</i> sp.                    | 125                               | 5 230                                      | < 100                             | < 1 000                                    |
| <i>Nitzschia</i> cf. <i>acidoclinata</i> | < 100                             | < 1 000                                    | < 100                             | < 1 000                                    |
| <i>Nitzschia</i> sp.                     | < 100                             | 30 652                                     | < 100                             | < 1 000                                    |
| <i>Achnanthyidium minutissimum</i>       | < 100                             | < 1 000                                    | NF                                | NF                                         |
| <i>Psammothidium helveticum</i>          | < 100                             | 1 607                                      | < 100                             | 8792                                       |
| <i>Psammothidium levanderi</i>           | < 100                             | 1 275                                      | < 100                             | < 1 000                                    |
| <i>Encyonema gracile</i>                 | < 100                             | 277 178                                    | NF                                | NF                                         |
| <i>Encyonema perpusillum</i>             | < 100                             | < 1 000                                    | < 100                             | 346 120                                    |
| <i>Gomphonema angustatum</i>             | < 100                             | < 1 000                                    | < 100                             | < 1 000                                    |
| <i>Staurosira</i> aff. <i>venter</i>     | < 100                             | 11 469                                     | < 100                             | < 100                                      |
| <i>Staurosira pseudoconstruens</i>       | < 100                             | 7 646                                      | < 100                             | < 1 000                                    |
| <i>Staurosirella pinnata</i>             | < 100                             | 784                                        | < 100                             | < 1 000                                    |
| <i>Brachysira</i> sp.                    | < 100                             | < 1 000                                    | < 100                             | < 1 000                                    |
| <i>Cavinula pseudocutiformis</i>         | < 100                             | 24 638                                     | < 100                             | < 1 000                                    |
| <i>Frustulia rhomboides</i>              | < 100                             | 477 368                                    | < 100                             | 62 315                                     |
| <i>Navicula</i> NTA                      | < 100                             | < 1 000                                    | < 100                             | 2 861                                      |
| <i>Navicula</i> NTB                      | < 100                             | 20 343                                     | NF                                | NF                                         |

|                                           |        |           |       |         |
|-------------------------------------------|--------|-----------|-------|---------|
| <i>Pinnularia microstauron</i>            | < 100  | 139 182   | < 100 | 4 585   |
| <i>Pinnularia</i> cf. <i>viridis</i>      | < 100  | 689 818   | < 100 | 48 192  |
| <i>Pinnularia subcapitata</i>             | < 100  | < 1 000   | NF    | NF      |
| <i>Pinnularia</i> sp. 1                   | < 100  | < 1 000   | < 100 | < 1 000 |
| <i>Pinnularia</i> sp. 2                   | < 100  | < 1 000   | < 100 | < 1 000 |
| <i>Sellaphora</i> sp.                     | < 100  | < 1 000   | ND    | ND      |
| <i>Stauroneis anceps</i>                  | < 100  | < 1 000   | < 100 | < 1 000 |
| <i>Stenopterobia</i> sp. 1                | < 100  | 46 620    | < 100 | 19 657  |
| <i>Stenopterobia</i> sp. 2                | < 100  | 69 918    | < 100 | 29 485  |
| <i>Surirella</i> cf. <i>linearis</i>      | < 100  | 557 254   | < 100 | 135 968 |
| <i>Surirella</i> cf. <i>angusta</i>       | < 100  | 14 338    | < 100 | < 1 000 |
| <i>Surirella</i> sp.                      | < 100  | < 1 000   | < 100 | < 100   |
| <i>Chrysochromulina</i> aff. <i>parva</i> | 8271   | 52 796    | 7034  | 44 899  |
| <i>Chroomonas nordstedt</i>               | 221    | 43 233    | NF    | NF      |
| <i>Chroomonas</i> sp.                     | < 100  | < 1 000   | < 100 | 1 827   |
| <i>Cryptomonas</i> sp. 1                  | 403    | 473 027   | 103   | 8 716   |
| <i>Cryptomonas</i> sp. 2                  | < 100  | < 1 000   | < 100 | < 1 000 |
| <i>Gymnodinium</i> sp.                    | < 100  | 1 997     | < 100 | 412 969 |
| <i>Parvodinium umbonatum</i>              | 1240   | 977 427   | < 100 | 343 305 |
| <i>Peridinium</i> cf. <i>volzii</i>       | 191    | 5 005     | NF    | NF      |
| <i>Peridinium williei</i>                 | < 100  | 221 574   | 574   | 380 545 |
| <i>Euglena</i> sp.                        | < 100  | < 100     | NF    | NF      |
| <i>Lepocinclis</i> sp.                    | < 100  | 473 027   | NF    | NF      |
| <i>Trachelomonas</i> sp. 1                | 487    | 72 592    | NF    | NF      |
| <i>Trachelomonas</i> sp. 2                | < 100  | < 1 000   | NF    | NF      |
| <i>Chlamydomonas</i> sp.1                 | 121    | 38 042    | 4007  | 97 895  |
| <i>Chlamydomonas</i> sp. 2                | < 100  | 107 564   | < 100 | < 1 000 |
| <i>Carteria</i> sp.                       | 629    | 130 372   | < 100 | < 1 000 |
| <i>Gemmellicystis planctonica</i>         | 6515   | 316 067   | 286   | 13 966  |
| <i>Microglena</i> sp.                     | < 100  | < 100     | NF    | NF      |
| <i>Palmella</i> sp.                       | < 100  | 6 031     | < 100 | < 1000  |
| <i>Sphaerocystis schroeteri</i>           | 19 837 | 1 658 041 | 907   | 75913   |
| <i>Oocystis lacustris</i>                 | 64 498 | 1 213 810 | 227   | 4272    |
| <i>Oocystis</i> sp.                       | 139    | < 1 000   | < 100 | NF      |
| <i>Oedogonio</i> sp.                      | < 100  | < 1 000   | < 100 | < 1 000 |
| <i>Ankistrodesmus</i> sp.                 | < 100  | < 1 000   | NF    | NF      |
| <i>Coelastrum</i> sp.                     | < 100  | < 1 000   | NF    | NF      |
| <i>Desmodesmus abundans</i>               | < 100  | < 1 000   | < 100 | NF      |
| <i>Desmodesmus spinosus</i>               | < 100  | < 1 000   | NF    | NF      |
| <i>Gloeocystis</i> sp.                    | 487    | 344 793   | NF    | NF      |
| <i>Monoraphidium minutum</i>              | < 100  | < 1 000   | NF    | NF      |
| <i>Monoraphidium obtusum</i>              | 9 700  | 2 172 606 | < 100 | < 1 000 |

|                                     |       |         |       |         |
|-------------------------------------|-------|---------|-------|---------|
| <i>Tetradismus obliquus</i>         | < 100 | < 1 000 | NF    | NF      |
| <i>Botryococcus braunii</i>         | 593   | 139 858 | < 100 | < 1 000 |
| <i>Nitella</i> sp.                  | < 100 | ND      | NF    | NF      |
| <i>Chaetosphaeridium globosum</i>   | 3 326 | 9 073   | 350   | 1 092   |
| <i>Cosmarium</i> cf. <i>exiguum</i> | < 100 | 5 273   | < 100 | 1 778   |
| <i>Closterium lunula</i>            | < 100 | < 1 000 | < 100 | < 1 000 |
| <i>Closterium</i> sp.               | < 100 | < 1 000 | < 100 | < 1 000 |
| <i>Desmidium</i> sp.                | < 100 | < 1 000 | < 100 | < 1 000 |
| <i>Euastrum</i> cf. <i>oblongum</i> | < 100 | < 1 000 | < 100 | < 1 000 |
| <i>Micrasterias radiosa</i>         | < 100 | < 1 000 | < 100 | < 1 000 |
| <i>Stauroastrum</i> sp.             | < 100 | < 1 000 | < 100 | < 1 000 |
| <i>Temnogametum iztacalense</i>     | < 100 | 997 304 | < 100 | 3 062   |
| <i>Spirogyra</i> sp.                | < 100 | < 1 000 | NF    | NF      |
| <i>Zygnema</i> sp.                  | < 100 | 280 473 | < 100 | < 1 000 |
